# Supplementary material
Source: publisher figshare collection journal article supplement (https://acs.figshare.com/ndownloader/files/3616815)
Supplement: Supplementary file 1 [file 3616815]

 
data_danm13t 
 
_audit_creation_method            SHELXL-97 
_chemical_name_systematic 
; 
 ? 
; 
_chemical_name_common             ? 
_chemical_melting_point           ? 
_chemical_formula_moiety          ? 
_chemical_formula_sum 
 'C38 H63 N Ni O1.50 P2' 
_chemical_formula_weight          678.54 
 
loop_ 
 _atom_type_symbol 
 _atom_type_description 
 _atom_type_scat_dispersion_real 
 _atom_type_scat_dispersion_imag 
 _atom_type_scat_source 
 'C'  'C'   0.0033   0.0016 
 'International Tables Vol C Tables 4.2.6.8 and 6.1.1.4' 
 'H'  'H'   0.0000   0.0000 
 'International Tables Vol C Tables 4.2.6.8 and 6.1.1.4' 
 'N'  'N'   0.0061   0.0033 
 'International Tables Vol C Tables 4.2.6.8 and 6.1.1.4' 
 'O'  'O'   0.0106   0.0060 
 'International Tables Vol C Tables 4.2.6.8 and 6.1.1.4' 
 'P'  'P'   0.1023   0.0942 
 'International Tables Vol C Tables 4.2.6.8 and 6.1.1.4' 
 'Ni'  'Ni'   0.3393   1.1124 
 'International Tables Vol C Tables 4.2.6.8 and 6.1.1.4' 
 
_symmetry_cell_setting            ? 
_symmetry_space_group_name_H-M    ? 
 
loop_ 
 _symmetry_equiv_pos_as_xyz 
 'x, y, z' 
 '-x+1/2, y+1/2, -z+1/2' 
 '-x, -y, -z' 
 'x-1/2, -y-1/2, z-1/2' 
 
_cell_length_a                    9.9378(6) 
_cell_length_b                    18.7987(12) 
_cell_length_c                    20.7194(13) 
_cell_angle_alpha                 90.00 
_cell_angle_beta                  99.4030(10) 
_cell_angle_gamma                 90.00 
_cell_volume                      3818.7(4) 
_cell_formula_units_Z             4 
_cell_measurement_temperature     373(2) 
_cell_measurement_reflns_used     ? 
_cell_measurement_theta_min       ? 
_cell_measurement_theta_max       ? 
 
_exptl_crystal_description        ? 
_exptl_crystal_colour             ? 
_exptl_crystal_size_max           0.30 
_exptl_crystal_size_mid           0.25 
_exptl_crystal_size_min           0.04 
_exptl_crystal_density_meas       ? 
_exptl_crystal_density_diffrn     1.180 
_exptl_crystal_density_method     'not measured' 
_exptl_crystal_F_000              1472 
_exptl_absorpt_coefficient_mu     0.622 
_exptl_absorpt_correction_type    ? 
_exptl_absorpt_correction_T_min   0.8354 
_exptl_absorpt_correction_T_max   0.9756 
_exptl_absorpt_process_details    ? 
 
_exptl_special_details 
; 
 ? 
; 
 
_diffrn_ambient_temperature       373(2) 
_diffrn_radiation_wavelength      0.71073 
_diffrn_radiation_type            MoK\a 
_diffrn_radiation_source          'fine-focus sealed tube' 
_diffrn_radiation_monochromator   graphite 
_diffrn_measurement_device_type   ? 
_diffrn_measurement_method        ? 
_diffrn_detector_area_resol_mean  ? 
_diffrn_standards_number          ? 
_diffrn_standards_interval_count  ? 
_diffrn_standards_interval_time   ? 
_diffrn_standards_decay_%         ? 
_diffrn_reflns_number             15316 
_diffrn_reflns_av_R_equivalents   0.0437 
_diffrn_reflns_av_sigmaI/netI     0.0383 
_diffrn_reflns_limit_h_min        -10 
_diffrn_reflns_limit_h_max        10 
_diffrn_reflns_limit_k_min        -19 
_diffrn_reflns_limit_k_max        20 
_diffrn_reflns_limit_l_min        -18 
_diffrn_reflns_limit_l_max        22 
_diffrn_reflns_theta_min          2.15 
_diffrn_reflns_theta_max          22.50 
_reflns_number_total              4992 
_reflns_number_gt                 4802 
_reflns_threshold_expression      >2sigma(I) 
 
_computing_data_collection        ? 
_computing_cell_refinement        ? 
_computing_data_reduction         ? 
_computing_structure_solution     'SHELXS-97 (Sheldrick, 1990)' 
_computing_structure_refinement   'SHELXL-97 (Sheldrick, 1997)' 
_computing_molecular_graphics     ? 
_computing_publication_material   ? 
 
_refine_special_details 
; 
 Refinement of F^2^ against ALL reflections.  The weighted R-factor wR and 
 goodness of fit S are based on F^2^, conventional R-factors R are based 
 on F, with F set to zero for negative F^2^. The threshold expression of 
 F^2^ > 2sigma(F^2^) is used only for calculating R-factors(gt) etc. and is 
 not relevant to the choice of reflections for refinement.  R-factors based 
 on F^2^ are statistically about twice as large as those based on F, and R- 
 factors based on ALL data will be even larger. 
; 
 
_refine_ls_structure_factor_coef  Fsqd  
_refine_ls_matrix_type            full 
_refine_ls_weighting_scheme       calc  
_refine_ls_weighting_details 
 'calc w=1/[\s^2^(Fo^2^)+(0.0148P)^2^+13.5934P] where P=(Fo^2^+2Fc^2^)/3' 
_atom_sites_solution_primary      direct 
_atom_sites_solution_secondary    difmap 
_atom_sites_solution_hydrogens    geom 
_refine_ls_hydrogen_treatment     mixed 
_refine_ls_extinction_method      SHELXL 
_refine_ls_extinction_coef        0.00000(13) 
_refine_ls_extinction_expression 
 'Fc^*^=kFc[1+0.001xFc^2^\l^3^/sin(2\q)]^-1/4^' 
_refine_ls_number_reflns          4992 
_refine_ls_number_parameters      398 
_refine_ls_number_restraints      0 
_refine_ls_R_factor_all           0.0723 
_refine_ls_R_factor_gt            0.0697 
_refine_ls_wR_factor_ref          0.1343 
_refine_ls_wR_factor_gt           0.1333 
_refine_ls_goodness_of_fit_ref    1.317 
_refine_ls_restrained_S_all       1.317 
_refine_ls_shift/su_max           4.951 
_refine_ls_shift/su_mean          0.014 
 
loop_ 
 _atom_site_label 
 _atom_site_type_symbol 
 _atom_site_fract_x 
 _atom_site_fract_y 
 _atom_site_fract_z 
 _atom_site_U_iso_or_equiv 
 _atom_site_adp_type 
 _atom_site_occupancy 
 _atom_site_symmetry_multiplicity 
 _atom_site_calc_flag 
 _atom_site_refinement_flags 
 _atom_site_disorder_assembly 
 _atom_site_disorder_group 
Ni Ni 0.75277(6) 0.19836(3) 0.11854(3) 0.0139(2) Uani 1 1 d . . . 
P2 P 0.74404(13) 0.20079(8) 0.01105(6) 0.0194(3) Uani 1 1 d . . . 
P1 P 0.52544(12) 0.19461(7) 0.10453(6) 0.0174(3) Uani 1 1 d . . . 
O O 0.9396(3) 0.18852(18) 0.13025(15) 0.0191(8) Uani 1 1 d . . . 
N N 0.8148(4) 0.1952(2) 0.21148(18) 0.0160(9) Uani 1 1 d . . . 
C1 C 0.4643(5) 0.2097(3) 0.0162(2) 0.0212(12) Uani 1 1 d . . . 
H1A H 0.3795 0.1840 0.0034 0.025 Uiso 1 1 calc R . . 
H1B H 0.4450 0.2600 0.0091 0.025 Uiso 1 1 calc R . . 
C74 C 0.7595(5) 0.3413(3) 0.3615(2) 0.0229(12) Uani 1 1 d . . . 
H74A H 0.7427 0.3730 0.3937 0.027 Uiso 1 1 calc R . . 
C71 C 0.8009(4) 0.2461(3) 0.2612(2) 0.0142(11) Uani 1 1 d . . . 
C75 C 0.7348(5) 0.2696(3) 0.3672(2) 0.0183(12) Uani 1 1 d . . . 
H75A H 0.7028 0.2531 0.4042 0.022 Uiso 1 1 calc R . . 
C10 C 0.9544(5) 0.1844(3) 0.1991(2) 0.0159(11) Uani 1 1 d . . . 
C63 C 0.7880(6) 0.2973(3) -0.0912(3) 0.0361(15) Uani 1 1 d . . . 
H63A H 0.8147 0.3445 -0.1017 0.054 Uiso 1 1 calc R . . 
H63B H 0.6970 0.2881 -0.1131 0.054 Uiso 1 1 calc R . . 
H63C H 0.8494 0.2633 -0.1051 0.054 Uiso 1 1 calc R . . 
C3 C 0.4589(5) 0.1035(3) 0.1208(2) 0.0188(11) Uani 1 1 d . . . 
C76 C 0.7565(5) 0.2214(3) 0.3191(2) 0.0146(11) Uani 1 1 d . . . 
C72 C 0.8316(5) 0.3203(2) 0.2570(2) 0.0168(11) Uani 1 1 d . . . 
C2 C 0.5661(5) 0.1863(3) -0.0281(2) 0.0228(12) Uani 1 1 d . . . 
H2A H 0.5486 0.2128 -0.0687 0.027 Uiso 1 1 calc R . . 
H2B H 0.5526 0.1362 -0.0384 0.027 Uiso 1 1 calc R . . 
C33 C 0.5193(5) 0.0795(3) 0.1898(2) 0.0225(12) Uani 1 1 d . . . 
H33A H 0.4852 0.0331 0.1978 0.034 Uiso 1 1 calc R . . 
H33B H 0.4938 0.1125 0.2210 0.034 Uiso 1 1 calc R . . 
H33C H 0.6169 0.0778 0.1941 0.034 Uiso 1 1 calc R . . 
C43 C 0.4251(5) 0.2480(3) 0.2152(2) 0.0249(13) Uani 1 1 d . . . 
H43A H 0.3738 0.2840 0.2333 0.037 Uiso 1 1 calc R . . 
H43B H 0.5172 0.2478 0.2382 0.037 Uiso 1 1 calc R . . 
H43C H 0.3842 0.2024 0.2195 0.037 Uiso 1 1 calc R . . 
C101 C 1.0154(5) 0.1135(3) 0.2226(2) 0.0156(11) Uani 1 1 d . . . 
C31 C 0.3026(5) 0.0979(3) 0.1110(3) 0.0237(12) Uani 1 1 d . . . 
H31A H 0.2769 0.0501 0.1202 0.035 Uiso 1 1 calc R . . 
H31B H 0.2653 0.1098 0.0667 0.035 Uiso 1 1 calc R . . 
H31C H 0.2678 0.1302 0.1402 0.035 Uiso 1 1 calc R . . 
C32 C 0.5096(5) 0.0513(3) 0.0738(3) 0.0243(12) Uani 1 1 d . . . 
H32A H 0.4772 0.0044 0.0812 0.036 Uiso 1 1 calc R . . 
H32B H 0.6076 0.0513 0.0810 0.036 Uiso 1 1 calc R . . 
H32C H 0.4761 0.0655 0.0295 0.036 Uiso 1 1 calc R . . 
C73 C 0.8093(5) 0.3655(3) 0.3071(2) 0.0184(11) Uani 1 1 d . . . 
H73A H 0.8285 0.4136 0.3040 0.022 Uiso 1 1 calc R . . 
C4 C 0.4254(5) 0.2638(3) 0.1429(2) 0.0181(11) Uani 1 1 d . . . 
C53 C 0.8265(5) 0.0602(3) 0.0089(2) 0.0257(13) Uani 1 1 d . . . 
H53A H 0.8756 0.0234 -0.0094 0.039 Uiso 1 1 calc R . . 
H53B H 0.7318 0.0476 0.0040 0.039 Uiso 1 1 calc R . . 
H53C H 0.8627 0.0658 0.0545 0.039 Uiso 1 1 calc R . . 
C104 C 1.1381(5) -0.0169(3) 0.2587(3) 0.0262(13) Uani 1 1 d . . . 
H10A H 1.1796 -0.0605 0.2702 0.031 Uiso 1 1 calc R . . 
C52 C 0.7892(6) 0.1180(3) -0.1004(2) 0.0300(14) Uani 1 1 d . . . 
H52A H 0.8427 0.0817 -0.1166 0.045 Uiso 1 1 calc R . . 
H52B H 0.7971 0.1615 -0.1237 0.045 Uiso 1 1 calc R . . 
H52C H 0.6954 0.1035 -0.1065 0.045 Uiso 1 1 calc R . . 
C102 C 0.9475(5) 0.0501(3) 0.2053(2) 0.0199(12) Uani 1 1 d . . . 
H10B H 0.8599 0.0513 0.1813 0.024 Uiso 1 1 calc R . . 
C42 C 0.2765(5) 0.2741(3) 0.1080(3) 0.0278(13) Uani 1 1 d . . . 
H42A H 0.2332 0.3101 0.1304 0.042 Uiso 1 1 calc R . . 
H42B H 0.2275 0.2302 0.1086 0.042 Uiso 1 1 calc R . . 
H42C H 0.2764 0.2886 0.0636 0.042 Uiso 1 1 calc R . . 
C6 C 0.7929(5) 0.2911(3) -0.0170(2) 0.0258(13) Uani 1 1 d . . . 
C106 C 1.1448(5) 0.1102(3) 0.2588(2) 0.0185(11) Uani 1 1 d . . . 
H10C H 1.1916 0.1521 0.2713 0.022 Uiso 1 1 calc R . . 
C9 C 0.7392(5) 0.1428(3) 0.3308(2) 0.0179(11) Uani 1 1 d . . . 
H9A H 0.7332 0.1185 0.2886 0.021 Uiso 1 1 calc R . . 
C5 C 0.8413(5) 0.1299(3) -0.0267(2) 0.0237(12) Uani 1 1 d . . . 
C62 C 0.6914(5) 0.3439(3) 0.0037(3) 0.0296(13) Uani 1 1 d . . . 
H62A H 0.7124 0.3910 -0.0097 0.044 Uiso 1 1 calc R . . 
H62B H 0.6972 0.3426 0.0504 0.044 Uiso 1 1 calc R . . 
H62C H 0.6006 0.3313 -0.0166 0.044 Uiso 1 1 calc R . . 
C92 C 0.8639(5) 0.1136(3) 0.3760(3) 0.0284(13) Uani 1 1 d . . . 
H92A H 0.9447 0.1244 0.3580 0.043 Uiso 1 1 calc R . . 
H92B H 0.8553 0.0630 0.3799 0.043 Uiso 1 1 calc R . . 
H92C H 0.8700 0.1352 0.4184 0.043 Uiso 1 1 calc R . . 
C105 C 1.2061(5) 0.0453(3) 0.2769(3) 0.0250(13) Uani 1 1 d . . . 
H10D H 1.2934 0.0439 0.3013 0.030 Uiso 1 1 calc R . . 
C51 C 0.9938(5) 0.1480(3) -0.0172(3) 0.0270(13) Uani 1 1 d . . . 
H51A H 1.0416 0.1114 -0.0366 0.040 Uiso 1 1 calc R . . 
H51B H 1.0290 0.1511 0.0287 0.040 Uiso 1 1 calc R . . 
H51C H 1.0062 0.1927 -0.0378 0.040 Uiso 1 1 calc R . . 
C8 C 0.8910(5) 0.3533(3) 0.2010(2) 0.0216(12) Uani 1 1 d . . . 
H8A H 0.8806 0.3189 0.1649 0.026 Uiso 1 1 calc R . . 
C103 C 1.0078(5) -0.0146(3) 0.2232(3) 0.0249(13) Uani 1 1 d . . . 
H10E H 0.9608 -0.0566 0.2113 0.030 Uiso 1 1 calc R . . 
C61 C 0.9358(5) 0.3129(3) 0.0191(3) 0.0274(13) Uani 1 1 d . . . 
H61A H 0.9593 0.3588 0.0040 0.041 Uiso 1 1 calc R . . 
H61B H 1.0020 0.2786 0.0104 0.041 Uiso 1 1 calc R . . 
H61C H 0.9347 0.3149 0.0653 0.041 Uiso 1 1 calc R . . 
C91 C 0.6088(5) 0.1256(3) 0.3586(3) 0.0259(13) Uani 1 1 d . . . 
H91A H 0.5311 0.1440 0.3298 0.039 Uiso 1 1 calc R . . 
H91B H 0.6138 0.1470 0.4010 0.039 Uiso 1 1 calc R . . 
H91C H 0.5999 0.0750 0.3624 0.039 Uiso 1 1 calc R . . 
C81 C 0.8236(6) 0.4224(3) 0.1750(3) 0.0294(13) Uani 1 1 d . . . 
H81A H 0.7278 0.4147 0.1612 0.044 Uiso 1 1 calc R . . 
H81B H 0.8638 0.4386 0.1386 0.044 Uiso 1 1 calc R . . 
H81C H 0.8367 0.4577 0.2090 0.044 Uiso 1 1 calc R . . 
C82 C 1.0445(6) 0.3680(3) 0.2219(3) 0.0318(14) Uani 1 1 d . . . 
H82A H 1.0899 0.3249 0.2379 0.048 Uiso 1 1 calc R . . 
H82B H 1.0569 0.4033 0.2559 0.048 Uiso 1 1 calc R . . 
H82C H 1.0822 0.3851 0.1850 0.048 Uiso 1 1 calc R . . 
C41 C 0.5017(5) 0.3334(3) 0.1387(3) 0.0265(13) Uani 1 1 d . . . 
H41A H 0.4554 0.3710 0.1575 0.040 Uiso 1 1 calc R . . 
H41B H 0.5051 0.3442 0.0937 0.040 Uiso 1 1 calc R . . 
H41C H 0.5929 0.3289 0.1623 0.040 Uiso 1 1 calc R . . 
H1 H 1.007(4) 0.221(2) 0.220(2) 0.000(11) Uiso 1 1 d . . . 
O1S O 0.0000 0.5000 0.0000 0.37(2) Uani 1 2 d S . . 
C3S C 0.243(4) 0.4636(18) 0.0451(17) 0.159(12) Uiso 0.50 1 d P . . 
C2S C 0.150(7) 0.488(4) 0.061(3) 0.32(3) Uiso 0.50 1 d P . . 
 
loop_ 
 _atom_site_aniso_label 
 _atom_site_aniso_U_11 
 _atom_site_aniso_U_22 
 _atom_site_aniso_U_33 
 _atom_site_aniso_U_23 
 _atom_site_aniso_U_13 
 _atom_site_aniso_U_12 
Ni 0.0109(3) 0.0208(4) 0.0097(3) -0.0016(3) 0.0010(2) 0.0004(3) 
P2 0.0142(7) 0.0324(8) 0.0114(7) -0.0003(6) 0.0012(5) 0.0004(6) 
P1 0.0122(6) 0.0254(8) 0.0141(7) -0.0033(6) 0.0007(5) 0.0005(6) 
O 0.0143(17) 0.029(2) 0.0139(18) 0.0006(15) 0.0022(14) -0.0007(15) 
N 0.009(2) 0.025(2) 0.014(2) -0.0043(19) 0.0045(16) 0.0035(18) 
C1 0.015(3) 0.026(3) 0.021(3) -0.004(2) -0.001(2) 0.000(2) 
C74 0.023(3) 0.026(3) 0.019(3) -0.006(2) 0.002(2) 0.005(2) 
C71 0.004(2) 0.027(3) 0.009(3) -0.001(2) -0.0044(19) 0.007(2) 
C75 0.018(3) 0.028(3) 0.008(3) 0.002(2) -0.001(2) 0.004(2) 
C10 0.020(3) 0.015(3) 0.011(3) -0.005(2) 0.001(2) -0.008(2) 
C63 0.032(3) 0.050(4) 0.024(3) 0.002(3) 0.000(3) -0.009(3) 
C3 0.013(3) 0.026(3) 0.016(3) -0.007(2) -0.001(2) -0.001(2) 
C76 0.009(2) 0.023(3) 0.011(2) -0.003(2) 0.0004(19) 0.000(2) 
C72 0.015(3) 0.015(3) 0.019(3) -0.001(2) -0.001(2) 0.003(2) 
C2 0.018(3) 0.041(3) 0.008(3) 0.001(2) -0.001(2) 0.002(2) 
C33 0.024(3) 0.024(3) 0.020(3) -0.005(2) 0.004(2) -0.002(2) 
C43 0.024(3) 0.030(3) 0.021(3) -0.010(2) 0.005(2) 0.003(2) 
C101 0.015(3) 0.026(3) 0.006(2) -0.004(2) 0.005(2) 0.002(2) 
C31 0.015(3) 0.030(3) 0.025(3) -0.010(2) 0.000(2) -0.007(2) 
C32 0.022(3) 0.025(3) 0.026(3) -0.005(2) 0.006(2) -0.001(2) 
C73 0.014(3) 0.021(3) 0.019(3) -0.002(2) -0.002(2) 0.002(2) 
C4 0.012(3) 0.023(3) 0.019(3) -0.006(2) 0.002(2) -0.003(2) 
C53 0.020(3) 0.036(3) 0.021(3) -0.011(2) 0.004(2) -0.001(2) 
C104 0.025(3) 0.027(3) 0.027(3) 0.006(2) 0.007(2) 0.008(3) 
C52 0.033(3) 0.040(4) 0.018(3) -0.011(3) 0.006(2) -0.005(3) 
C102 0.014(3) 0.027(3) 0.017(3) -0.005(2) -0.002(2) 0.001(2) 
C42 0.019(3) 0.034(3) 0.030(3) -0.006(3) 0.004(2) 0.007(2) 
C6 0.023(3) 0.039(3) 0.016(3) 0.003(2) 0.003(2) 0.003(3) 
C106 0.016(3) 0.025(3) 0.015(3) 0.002(2) 0.005(2) -0.003(2) 
C9 0.020(3) 0.018(3) 0.015(3) -0.001(2) 0.003(2) -0.005(2) 
C5 0.018(3) 0.037(3) 0.016(3) -0.008(2) 0.002(2) 0.001(2) 
C62 0.029(3) 0.029(3) 0.029(3) 0.007(3) 0.000(3) 0.002(3) 
C92 0.033(3) 0.028(3) 0.023(3) 0.002(2) 0.002(3) 0.002(3) 
C105 0.010(3) 0.036(3) 0.027(3) 0.005(3) -0.002(2) 0.002(2) 
C51 0.013(3) 0.040(4) 0.027(3) -0.003(3) 0.004(2) 0.001(2) 
C8 0.022(3) 0.024(3) 0.019(3) -0.006(2) 0.003(2) -0.005(2) 
C103 0.025(3) 0.019(3) 0.031(3) 0.001(2) 0.007(2) -0.007(2) 
C61 0.026(3) 0.033(3) 0.023(3) 0.005(3) 0.005(2) -0.001(3) 
C91 0.029(3) 0.029(3) 0.021(3) -0.007(2) 0.010(2) -0.008(3) 
C81 0.041(3) 0.026(3) 0.022(3) 0.005(2) 0.006(3) -0.009(3) 
C82 0.035(3) 0.020(3) 0.045(4) -0.004(3) 0.020(3) -0.008(3) 
C41 0.018(3) 0.030(3) 0.033(3) 0.000(3) 0.007(2) 0.003(2) 
O1S 0.81(6) 0.108(12) 0.213(19) -0.002(12) 0.16(3) -0.26(2) 
 
_geom_special_details 
; 
 All esds (except the esd in the dihedral angle between two l.s. planes) 
 are estimated using the full covariance matrix.  The cell esds are taken 
 into account individually in the estimation of esds in distances, angles 
 and torsion angles; correlations between esds in cell parameters are only 
 used when they are defined by crystal symmetry.  An approximate (isotropic) 
 treatment of cell esds is used for estimating esds involving l.s. planes. 
; 
 
loop_ 
 _geom_bond_atom_site_label_1 
 _geom_bond_atom_site_label_2 
 _geom_bond_distance 
 _geom_bond_site_symmetry_2 
 _geom_bond_publ_flag 
Ni O 1.842(3) . ? 
Ni N 1.924(4) . ? 
Ni P2 2.2151(14) . ? 
Ni P1 2.2313(14) . ? 
Ni C10 2.404(5) . ? 
P2 C2 1.841(5) . ? 
P2 C6 1.884(6) . ? 
P2 C5 1.890(5) . ? 
P1 C1 1.855(5) . ? 
P1 C3 1.887(5) . ? 
P1 C4 1.889(5) . ? 
O C10 1.413(6) . ? 
N C71 1.430(6) . ? 
N C10 1.465(6) . ? 
C1 C2 1.536(7) . ? 
C1 H1A 0.9700 . ? 
C1 H1B 0.9700 . ? 
C74 C73 1.379(7) . ? 
C74 C75 1.379(7) . ? 
C74 H74A 0.9300 . ? 
C71 C76 1.422(7) . ? 
C71 C72 1.434(7) . ? 
C75 C76 1.390(7) . ? 
C75 H75A 0.9300 . ? 
C10 C101 1.511(7) . ? 
C10 H1 0.93(4) . ? 
C63 C6 1.533(7) . ? 
C63 H63A 0.9600 . ? 
C63 H63B 0.9600 . ? 
C63 H63C 0.9600 . ? 
C3 C32 1.524(7) . ? 
C3 C33 1.526(7) . ? 
C3 C31 1.537(7) . ? 
C76 C9 1.513(7) . ? 
C72 C73 1.386(7) . ? 
C72 C8 1.517(7) . ? 
C2 H2A 0.9700 . ? 
C2 H2B 0.9700 . ? 
C33 H33A 0.9600 . ? 
C33 H33B 0.9600 . ? 
C33 H33C 0.9600 . ? 
C43 C4 1.528(7) . ? 
C43 H43A 0.9600 . ? 
C43 H43B 0.9600 . ? 
C43 H43C 0.9600 . ? 
C101 C106 1.379(7) . ? 
C101 C102 1.387(7) . ? 
C31 H31A 0.9600 . ? 
C31 H31B 0.9600 . ? 
C31 H31C 0.9600 . ? 
C32 H32A 0.9600 . ? 
C32 H32B 0.9600 . ? 
C32 H32C 0.9600 . ? 
C73 H73A 0.9300 . ? 
C4 C41 1.522(7) . ? 
C4 C42 1.549(7) . ? 
C53 C5 1.522(8) . ? 
C53 H53A 0.9600 . ? 
C53 H53B 0.9600 . ? 
C53 H53C 0.9600 . ? 
C104 C105 1.372(8) . ? 
C104 C103 1.382(7) . ? 
C104 H10A 0.9300 . ? 
C52 C5 1.546(7) . ? 
C52 H52A 0.9600 . ? 
C52 H52B 0.9600 . ? 
C52 H52C 0.9600 . ? 
C102 C103 1.380(7) . ? 
C102 H10B 0.9300 . ? 
C42 H42A 0.9600 . ? 
C42 H42B 0.9600 . ? 
C42 H42C 0.9600 . ? 
C6 C62 1.527(7) . ? 
C6 C61 1.548(7) . ? 
C106 C105 1.388(7) . ? 
C106 H10C 0.9300 . ? 
C9 C92 1.527(7) . ? 
C9 C91 1.537(7) . ? 
C9 H9A 0.9800 . ? 
C5 C51 1.534(7) . ? 
C62 H62A 0.9600 . ? 
C62 H62B 0.9600 . ? 
C62 H62C 0.9600 . ? 
C92 H92A 0.9600 . ? 
C92 H92B 0.9600 . ? 
C92 H92C 0.9600 . ? 
C105 H10D 0.9300 . ? 
C51 H51A 0.9600 . ? 
C51 H51B 0.9600 . ? 
C51 H51C 0.9600 . ? 
C8 C81 1.520(7) . ? 
C8 C82 1.542(7) . ? 
C8 H8A 0.9800 . ? 
C103 H10E 0.9300 . ? 
C61 H61A 0.9600 . ? 
C61 H61B 0.9600 . ? 
C61 H61C 0.9600 . ? 
C91 H91A 0.9600 . ? 
C91 H91B 0.9600 . ? 
C91 H91C 0.9600 . ? 
C81 H81A 0.9600 . ? 
C81 H81B 0.9600 . ? 
C81 H81C 0.9600 . ? 
C82 H82A 0.9600 . ? 
C82 H82B 0.9600 . ? 
C82 H82C 0.9600 . ? 
C41 H41A 0.9600 . ? 
C41 H41B 0.9600 . ? 
C41 H41C 0.9600 . ? 
O1S C2S 1.81(6) 3_565 ? 
O1S C2S 1.81(6) . ? 
C3S C2S 1.12(7) . ? 
 
loop_ 
 _geom_angle_atom_site_label_1 
 _geom_angle_atom_site_label_2 
 _geom_angle_atom_site_label_3 
 _geom_angle 
 _geom_angle_site_symmetry_1 
 _geom_angle_site_symmetry_3 
 _geom_angle_publ_flag 
O Ni N 73.38(15) . . ? 
O Ni P2 90.43(10) . . ? 
N Ni P2 163.78(12) . . ? 
O Ni P1 172.43(12) . . ? 
N Ni P1 106.34(11) . . ? 
P2 Ni P1 89.85(5) . . ? 
O Ni C10 35.89(15) . . ? 
N Ni C10 37.54(16) . . ? 
P2 Ni C10 126.30(12) . . ? 
P1 Ni C10 142.95(12) . . ? 
C2 P2 C6 106.0(2) . . ? 
C2 P2 C5 103.5(2) . . ? 
C6 P2 C5 109.4(2) . . ? 
C2 P2 Ni 108.45(16) . . ? 
C6 P2 Ni 111.06(17) . . ? 
C5 P2 Ni 117.59(17) . . ? 
C1 P1 C3 104.3(2) . . ? 
C1 P1 C4 101.5(2) . . ? 
C3 P1 C4 109.0(2) . . ? 
C1 P1 Ni 106.57(16) . . ? 
C3 P1 Ni 112.48(16) . . ? 
C4 P1 Ni 120.99(16) . . ? 
C10 O Ni 94.3(3) . . ? 
C71 N C10 115.2(4) . . ? 
C71 N Ni 130.4(3) . . ? 
C10 N Ni 89.3(3) . . ? 
C2 C1 P1 113.8(3) . . ? 
C2 C1 H1A 108.8 . . ? 
P1 C1 H1A 108.8 . . ? 
C2 C1 H1B 108.8 . . ? 
P1 C1 H1B 108.8 . . ? 
H1A C1 H1B 107.7 . . ? 
C73 C74 C75 119.0(5) . . ? 
C73 C74 H74A 120.5 . . ? 
C75 C74 H74A 120.5 . . ? 
C76 C71 N 118.0(4) . . ? 
C76 C71 C72 117.9(4) . . ? 
N C71 C72 124.0(4) . . ? 
C74 C75 C76 121.6(5) . . ? 
C74 C75 H75A 119.2 . . ? 
C76 C75 H75A 119.2 . . ? 
O C10 N 102.9(4) . . ? 
O C10 C101 110.1(4) . . ? 
N C10 C101 114.1(4) . . ? 
O C10 Ni 49.82(19) . . ? 
N C10 Ni 53.2(2) . . ? 
C101 C10 Ni 124.4(3) . . ? 
O C10 H1 113(3) . . ? 
N C10 H1 107(3) . . ? 
C101 C10 H1 110(3) . . ? 
Ni C10 H1 126(3) . . ? 
C6 C63 H63A 109.5 . . ? 
C6 C63 H63B 109.5 . . ? 
H63A C63 H63B 109.5 . . ? 
C6 C63 H63C 109.5 . . ? 
H63A C63 H63C 109.5 . . ? 
H63B C63 H63C 109.5 . . ? 
C32 C3 C33 106.8(4) . . ? 
C32 C3 C31 107.8(4) . . ? 
C33 C3 C31 109.7(4) . . ? 
C32 C3 P1 107.9(3) . . ? 
C33 C3 P1 109.9(3) . . ? 
C31 C3 P1 114.5(4) . . ? 
C75 C76 C71 119.9(5) . . ? 
C75 C76 C9 119.2(4) . . ? 
C71 C76 C9 120.9(4) . . ? 
C73 C72 C71 119.2(4) . . ? 
C73 C72 C8 117.0(4) . . ? 
C71 C72 C8 123.9(4) . . ? 
C1 C2 P2 112.0(3) . . ? 
C1 C2 H2A 109.2 . . ? 
P2 C2 H2A 109.2 . . ? 
C1 C2 H2B 109.2 . . ? 
P2 C2 H2B 109.2 . . ? 
H2A C2 H2B 107.9 . . ? 
C3 C33 H33A 109.5 . . ? 
C3 C33 H33B 109.5 . . ? 
H33A C33 H33B 109.5 . . ? 
C3 C33 H33C 109.5 . . ? 
H33A C33 H33C 109.5 . . ? 
H33B C33 H33C 109.5 . . ? 
C4 C43 H43A 109.5 . . ? 
C4 C43 H43B 109.5 . . ? 
H43A C43 H43B 109.5 . . ? 
C4 C43 H43C 109.5 . . ? 
H43A C43 H43C 109.5 . . ? 
H43B C43 H43C 109.5 . . ? 
C106 C101 C102 118.2(5) . . ? 
C106 C101 C10 120.3(5) . . ? 
C102 C101 C10 121.4(4) . . ? 
C3 C31 H31A 109.5 . . ? 
C3 C31 H31B 109.5 . . ? 
H31A C31 H31B 109.5 . . ? 
C3 C31 H31C 109.5 . . ? 
H31A C31 H31C 109.5 . . ? 
H31B C31 H31C 109.5 . . ? 
C3 C32 H32A 109.5 . . ? 
C3 C32 H32B 109.5 . . ? 
H32A C32 H32B 109.5 . . ? 
C3 C32 H32C 109.5 . . ? 
H32A C32 H32C 109.5 . . ? 
H32B C32 H32C 109.5 . . ? 
C74 C73 C72 122.2(5) . . ? 
C74 C73 H73A 118.9 . . ? 
C72 C73 H73A 118.9 . . ? 
C41 C4 C43 107.6(4) . . ? 
C41 C4 C42 108.2(4) . . ? 
C43 C4 C42 109.0(4) . . ? 
C41 C4 P1 105.5(3) . . ? 
C43 C4 P1 111.4(3) . . ? 
C42 C4 P1 114.8(3) . . ? 
C5 C53 H53A 109.5 . . ? 
C5 C53 H53B 109.5 . . ? 
H53A C53 H53B 109.5 . . ? 
C5 C53 H53C 109.5 . . ? 
H53A C53 H53C 109.5 . . ? 
H53B C53 H53C 109.5 . . ? 
C105 C104 C103 119.8(5) . . ? 
C105 C104 H10A 120.1 . . ? 
C103 C104 H10A 120.1 . . ? 
C5 C52 H52A 109.5 . . ? 
C5 C52 H52B 109.5 . . ? 
H52A C52 H52B 109.5 . . ? 
C5 C52 H52C 109.5 . . ? 
H52A C52 H52C 109.5 . . ? 
H52B C52 H52C 109.5 . . ? 
C103 C102 C101 121.1(4) . . ? 
C103 C102 H10B 119.4 . . ? 
C101 C102 H10B 119.4 . . ? 
C4 C42 H42A 109.5 . . ? 
C4 C42 H42B 109.5 . . ? 
H42A C42 H42B 109.5 . . ? 
C4 C42 H42C 109.5 . . ? 
H42A C42 H42C 109.5 . . ? 
H42B C42 H42C 109.5 . . ? 
C62 C6 C63 108.5(4) . . ? 
C62 C6 C61 106.7(4) . . ? 
C63 C6 C61 109.9(4) . . ? 
C62 C6 P2 106.5(4) . . ? 
C63 C6 P2 114.3(4) . . ? 
C61 C6 P2 110.6(4) . . ? 
C101 C106 C105 121.1(5) . . ? 
C101 C106 H10C 119.5 . . ? 
C105 C106 H10C 119.5 . . ? 
C76 C9 C92 110.3(4) . . ? 
C76 C9 C91 113.0(4) . . ? 
C92 C9 C91 110.2(4) . . ? 
C76 C9 H9A 107.7 . . ? 
C92 C9 H9A 107.7 . . ? 
C91 C9 H9A 107.7 . . ? 
C53 C5 C51 107.5(4) . . ? 
C53 C5 C52 108.1(4) . . ? 
C51 C5 C52 108.9(4) . . ? 
C53 C5 P2 108.0(3) . . ? 
C51 C5 P2 110.6(4) . . ? 
C52 C5 P2 113.5(4) . . ? 
C6 C62 H62A 109.5 . . ? 
C6 C62 H62B 109.5 . . ? 
H62A C62 H62B 109.5 . . ? 
C6 C62 H62C 109.5 . . ? 
H62A C62 H62C 109.5 . . ? 
H62B C62 H62C 109.5 . . ? 
C9 C92 H92A 109.5 . . ? 
C9 C92 H92B 109.5 . . ? 
H92A C92 H92B 109.5 . . ? 
C9 C92 H92C 109.5 . . ? 
H92A C92 H92C 109.5 . . ? 
H92B C92 H92C 109.5 . . ? 
C104 C105 C106 120.0(5) . . ? 
C104 C105 H10D 120.0 . . ? 
C106 C105 H10D 120.0 . . ? 
C5 C51 H51A 109.5 . . ? 
C5 C51 H51B 109.5 . . ? 
H51A C51 H51B 109.5 . . ? 
C5 C51 H51C 109.5 . . ? 
H51A C51 H51C 109.5 . . ? 
H51B C51 H51C 109.5 . . ? 
C72 C8 C81 114.6(4) . . ? 
C72 C8 C82 110.4(4) . . ? 
C81 C8 C82 107.7(4) . . ? 
C72 C8 H8A 108.0 . . ? 
C81 C8 H8A 108.0 . . ? 
C82 C8 H8A 108.0 . . ? 
C102 C103 C104 119.8(5) . . ? 
C102 C103 H10E 120.1 . . ? 
C104 C103 H10E 120.1 . . ? 
C6 C61 H61A 109.5 . . ? 
C6 C61 H61B 109.5 . . ? 
H61A C61 H61B 109.5 . . ? 
C6 C61 H61C 109.5 . . ? 
H61A C61 H61C 109.5 . . ? 
H61B C61 H61C 109.5 . . ? 
C9 C91 H91A 109.5 . . ? 
C9 C91 H91B 109.5 . . ? 
H91A C91 H91B 109.5 . . ? 
C9 C91 H91C 109.5 . . ? 
H91A C91 H91C 109.5 . . ? 
H91B C91 H91C 109.5 . . ? 
C8 C81 H81A 109.5 . . ? 
C8 C81 H81B 109.5 . . ? 
H81A C81 H81B 109.5 . . ? 
C8 C81 H81C 109.5 . . ? 
H81A C81 H81C 109.5 . . ? 
H81B C81 H81C 109.5 . . ? 
C8 C82 H82A 109.5 . . ? 
C8 C82 H82B 109.5 . . ? 
H82A C82 H82B 109.5 . . ? 
C8 C82 H82C 109.5 . . ? 
H82A C82 H82C 109.5 . . ? 
H82B C82 H82C 109.5 . . ? 
C4 C41 H41A 109.5 . . ? 
C4 C41 H41B 109.5 . . ? 
H41A C41 H41B 109.5 . . ? 
C4 C41 H41C 109.5 . . ? 
H41A C41 H41C 109.5 . . ? 
H41B C41 H41C 109.5 . . ? 
C2S O1S C2S 180(5) 3_565 . ? 
C3S C2S O1S 118(5) . . ? 
 
loop_ 
 _geom_torsion_atom_site_label_1 
 _geom_torsion_atom_site_label_2 
 _geom_torsion_atom_site_label_3 
 _geom_torsion_atom_site_label_4 
 _geom_torsion 
 _geom_torsion_site_symmetry_1 
 _geom_torsion_site_symmetry_2 
 _geom_torsion_site_symmetry_3 
 _geom_torsion_site_symmetry_4 
 _geom_torsion_publ_flag 
O Ni P2 C2 164.9(2) . . . . ? 
N Ni P2 C2 168.4(5) . . . . ? 
P1 Ni P2 C2 -7.6(2) . . . . ? 
C10 Ni P2 C2 163.7(2) . . . . ? 
O Ni P2 C6 -79.1(2) . . . . ? 
N Ni P2 C6 -75.5(5) . . . . ? 
P1 Ni P2 C6 108.49(18) . . . . ? 
C10 Ni P2 C6 -80.3(2) . . . . ? 
O Ni P2 C5 48.0(2) . . . . ? 
N Ni P2 C5 51.6(5) . . . . ? 
P1 Ni P2 C5 -124.40(19) . . . . ? 
C10 Ni P2 C5 46.9(2) . . . . ? 
O Ni P1 C1 -100.7(8) . . . . ? 
N Ni P1 C1 172.6(2) . . . . ? 
P2 Ni P1 C1 -8.55(18) . . . . ? 
C10 Ni P1 C1 -176.8(3) . . . . ? 
O Ni P1 C3 13.0(8) . . . . ? 
N Ni P1 C3 -73.7(2) . . . . ? 
P2 Ni P1 C3 105.18(17) . . . . ? 
C10 Ni P1 C3 -63.1(3) . . . . ? 
O Ni P1 C4 144.4(8) . . . . ? 
N Ni P1 C4 57.7(2) . . . . ? 
P2 Ni P1 C4 -123.49(19) . . . . ? 
C10 Ni P1 C4 68.2(3) . . . . ? 
N Ni O C10 2.7(3) . . . . ? 
P2 Ni O C10 -178.4(3) . . . . ? 
P1 Ni O C10 -86.3(8) . . . . ? 
O Ni N C71 120.7(4) . . . . ? 
P2 Ni N C71 116.9(5) . . . . ? 
P1 Ni N C71 -67.2(4) . . . . ? 
C10 Ni N C71 123.2(5) . . . . ? 
O Ni N C10 -2.6(3) . . . . ? 
P2 Ni N C10 -6.3(6) . . . . ? 
P1 Ni N C10 169.5(2) . . . . ? 
C3 P1 C1 C2 -92.0(4) . . . . ? 
C4 P1 C1 C2 154.7(4) . . . . ? 
Ni P1 C1 C2 27.2(4) . . . . ? 
C10 N C71 C76 -114.7(5) . . . . ? 
Ni N C71 C76 132.8(4) . . . . ? 
C10 N C71 C72 63.9(6) . . . . ? 
Ni N C71 C72 -48.6(6) . . . . ? 
C73 C74 C75 C76 -1.2(7) . . . . ? 
Ni O C10 N -3.4(3) . . . . ? 
Ni O C10 C101 118.6(3) . . . . ? 
C71 N C10 O -132.0(4) . . . . ? 
Ni N C10 O 3.3(3) . . . . ? 
C71 N C10 C101 108.7(5) . . . . ? 
Ni N C10 C101 -116.0(4) . . . . ? 
C71 N C10 Ni -135.3(4) . . . . ? 
N Ni C10 O -175.8(4) . . . . ? 
P2 Ni C10 O 2.0(3) . . . . ? 
P1 Ni C10 O 167.4(2) . . . . ? 
O Ni C10 N 175.8(4) . . . . ? 
P2 Ni C10 N 177.8(2) . . . . ? 
P1 Ni C10 N -16.8(4) . . . . ? 
O Ni C10 C101 -88.1(4) . . . . ? 
N Ni C10 C101 96.1(5) . . . . ? 
P2 Ni C10 C101 -86.1(4) . . . . ? 
P1 Ni C10 C101 79.3(4) . . . . ? 
C1 P1 C3 C32 55.7(4) . . . . ? 
C4 P1 C3 C32 163.5(3) . . . . ? 
Ni P1 C3 C32 -59.4(3) . . . . ? 
C1 P1 C3 C33 171.8(3) . . . . ? 
C4 P1 C3 C33 -80.4(4) . . . . ? 
Ni P1 C3 C33 56.7(4) . . . . ? 
C1 P1 C3 C31 -64.2(4) . . . . ? 
C4 P1 C3 C31 43.6(4) . . . . ? 
Ni P1 C3 C31 -179.3(3) . . . . ? 
C74 C75 C76 C71 -2.2(7) . . . . ? 
C74 C75 C76 C9 174.8(4) . . . . ? 
N C71 C76 C75 -176.6(4) . . . . ? 
C72 C71 C76 C75 4.7(6) . . . . ? 
N C71 C76 C9 6.4(6) . . . . ? 
C72 C71 C76 C9 -172.3(4) . . . . ? 
C76 C71 C72 C73 -3.9(6) . . . . ? 
N C71 C72 C73 177.5(4) . . . . ? 
C76 C71 C72 C8 174.7(4) . . . . ? 
N C71 C72 C8 -3.9(7) . . . . ? 
P1 C1 C2 P2 -34.5(5) . . . . ? 
C6 P2 C2 C1 -93.3(4) . . . . ? 
C5 P2 C2 C1 151.6(4) . . . . ? 
Ni P2 C2 C1 26.0(4) . . . . ? 
O C10 C101 C106 112.6(5) . . . . ? 
N C10 C101 C106 -132.3(4) . . . . ? 
Ni C10 C101 C106 167.0(3) . . . . ? 
O C10 C101 C102 -63.4(6) . . . . ? 
N C10 C101 C102 51.7(6) . . . . ? 
Ni C10 C101 C102 -9.0(6) . . . . ? 
C75 C74 C73 C72 2.0(7) . . . . ? 
C71 C72 C73 C74 0.6(7) . . . . ? 
C8 C72 C73 C74 -178.1(4) . . . . ? 
C1 P1 C4 C41 -80.6(4) . . . . ? 
C3 P1 C4 C41 169.7(3) . . . . ? 
Ni P1 C4 C41 36.9(4) . . . . ? 
C1 P1 C4 C43 162.9(3) . . . . ? 
C3 P1 C4 C43 53.2(4) . . . . ? 
Ni P1 C4 C43 -79.5(4) . . . . ? 
C1 P1 C4 C42 38.4(4) . . . . ? 
C3 P1 C4 C42 -71.3(4) . . . . ? 
Ni P1 C4 C42 155.9(3) . . . . ? 
C106 C101 C102 C103 -0.6(7) . . . . ? 
C10 C101 C102 C103 175.5(5) . . . . ? 
C2 P2 C6 C62 57.9(4) . . . . ? 
C5 P2 C6 C62 168.9(3) . . . . ? 
Ni P2 C6 C62 -59.7(4) . . . . ? 
C2 P2 C6 C63 -61.9(4) . . . . ? 
C5 P2 C6 C63 49.1(4) . . . . ? 
Ni P2 C6 C63 -179.4(3) . . . . ? 
C2 P2 C6 C61 173.5(3) . . . . ? 
C5 P2 C6 C61 -75.5(4) . . . . ? 
Ni P2 C6 C61 55.9(4) . . . . ? 
C102 C101 C106 C105 0.7(7) . . . . ? 
C10 C101 C106 C105 -175.5(4) . . . . ? 
C75 C76 C9 C92 -78.1(5) . . . . ? 
C71 C76 C9 C92 98.9(5) . . . . ? 
C75 C76 C9 C91 45.7(6) . . . . ? 
C71 C76 C9 C91 -137.4(4) . . . . ? 
C2 P2 C5 C53 -80.8(4) . . . . ? 
C6 P2 C5 C53 166.6(3) . . . . ? 
Ni P2 C5 C53 38.7(4) . . . . ? 
C2 P2 C5 C51 161.8(4) . . . . ? 
C6 P2 C5 C51 49.2(4) . . . . ? 
Ni P2 C5 C51 -78.7(4) . . . . ? 
C2 P2 C5 C52 39.1(4) . . . . ? 
C6 P2 C5 C52 -73.5(4) . . . . ? 
Ni P2 C5 C52 158.6(3) . . . . ? 
C103 C104 C105 C106 -0.9(8) . . . . ? 
C101 C106 C105 C104 0.1(7) . . . . ? 
C73 C72 C8 C81 -46.1(6) . . . . ? 
C71 C72 C8 C81 135.3(5) . . . . ? 
C73 C72 C8 C82 75.7(5) . . . . ? 
C71 C72 C8 C82 -103.0(5) . . . . ? 
C101 C102 C103 C104 -0.2(8) . . . . ? 
C105 C104 C103 C102 1.0(8) . . . . ? 
C2S O1S C2S C3S -137(100) 3_565 . . . ? 
 
_diffrn_measured_fraction_theta_max    0.999 
_diffrn_reflns_theta_full              22.50 
_diffrn_measured_fraction_theta_full   0.999 
_refine_diff_density_max    0.611 
_refine_diff_density_min   -0.563 
_refine_diff_density_rms    0.076 
